# Supplementary material
Source: publisher figshare collection journal article supplement (https://acs.figshare.com/ndownloader/files/4474195)
Supplement: Supplementary file 1 [file 4474195]

_publ_contact_author_name         'Doctor Helena I. S. Nogueira'
_publ_contact_author_address
; Department of Chemistry
  University of Aveiro
  CICECO
  3810-193 Aveiro
  Portugal
;

_publ_contact_author_email        'helenanogueira@ua.pt'
_publ_contact_author_fax          '+351 234 370727'
_publ_contact_author_phone        '+351 234 370360'

_journal_name_full                'Inorganic Chemistry'

loop_
_publ_author_name
_publ_author_footnote
_publ_author_address

'Soares-Santos, Paula C. R.' .
; Department of Chemistry
  University of Aveiro
  CICECO
  3810-193 Aveiro
  Portugal
;
 
'Cunha-Silva, Luis' .
; Department of Chemistry
  University of Aveiro
  CICECO
  3810-193 Aveiro
  Portugal

  Centro de Quimica Estrutural 
  Instituto Superior Tecnico
  Thecnical University of Lisbon
  Av Rovisco Pais, 1
  1049-001 Lisbon
  Portugal
;
 
'Almeida Paz, Filipe A.' .
; Department of Chemistry
  University of Aveiro
  CICECO
  3810-193 Aveiro
  Portugal
;
 
'Ferreira, Rute A. S.' .
; Department of Physics
  University of Aveiro
  CICECO
  3810-193 Aveiro
  Portugal
;

'Rocha, Jo\~ao'  .
; Department of Physics
  University of Aveiro
  CICECO
  3810-193 Aveiro
  Portugal
;

'Carlos, Luis D.' .
; Department of Physics
  University of Aveiro
  CICECO
  3810-193 Aveiro
  Portugal
;

'Nogueira, Helena I. S.'  .
; Department of Chemistry
  University of Aveiro
  CICECO
  3810-193
  Aveiro
  Portugal
;

 
data_2 
 
# =======================================================================
 
_audit_creation_method            'SHELXL-97, manual editing plus enCIFer'
_audit_creation_date              '17 June 2009'

# =======================================================================

_chemical_name_systematic 
; 
 ? 
; 
_chemical_name_common             ? 
_chemical_melting_point           ? 
_chemical_formula_moiety          
 'C7 H4 N2 Nd O7' 
_chemical_formula_sum 
 'C7 H4 N2 Nd O7' 
_chemical_formula_weight          372.36 
 
loop_ 
 _atom_type_symbol 
 _atom_type_description 
 _atom_type_scat_dispersion_real 
 _atom_type_scat_dispersion_imag 
 _atom_type_scat_source 
 'C'  'C'   0.0033   0.0016 
 'International Tables Vol C Tables 4.2.6.8 and 6.1.1.4' 
 'H'  'H'   0.0000   0.0000 
 'International Tables Vol C Tables 4.2.6.8 and 6.1.1.4' 
 'N'  'N'   0.0061   0.0033 
 'International Tables Vol C Tables 4.2.6.8 and 6.1.1.4' 
 'Nd'  'Nd'  -0.1943   3.0179 
 'International Tables Vol C Tables 4.2.6.8 and 6.1.1.4' 
 'O'  'O'   0.0106   0.0060 
 'International Tables Vol C Tables 4.2.6.8 and 6.1.1.4' 
 
_symmetry_cell_setting            Monoclinic 
_symmetry_space_group_name_H-M    'C 2/m' 
_symmetry_space_group_name_Hall   '-C 2y' 

 
loop_ 
 _symmetry_equiv_pos_as_xyz 
 'x, y, z' 
 '-x, y, -z' 
 'x+1/2, y+1/2, z' 
 '-x+1/2, y+1/2, -z' 
 '-x, -y, -z' 
 'x, -y, z' 
 '-x+1/2, -y+1/2, -z' 
 'x+1/2, -y+1/2, z' 
 
_cell_length_a                    10.6881(17) 
_cell_length_b                    8.1381(15) 
_cell_length_c                    11.296(3) 
_cell_angle_alpha                 90.00 
_cell_angle_beta                  106.293(10) 
_cell_angle_gamma                 90.00 
_cell_volume                      943.1(3) 
_cell_formula_units_Z             4 
_cell_measurement_temperature     150(2) 
_cell_measurement_reflns_used     2267 
_cell_measurement_theta_min       ? 
_cell_measurement_theta_max       ? 
 
_exptl_crystal_description        Plate 
_exptl_crystal_colour             Colourless 
_exptl_crystal_size_max           0.12 
_exptl_crystal_size_mid           0.10 
_exptl_crystal_size_min           0.08 
_exptl_crystal_density_meas       ? 
_exptl_crystal_density_diffrn     2.623 
_exptl_crystal_density_method     'not measured' 
_exptl_crystal_F_000              704 
_exptl_absorpt_coefficient_mu     5.535 
_exptl_absorpt_correction_type    Multi-scan 
_exptl_absorpt_correction_T_min   0.5564 
_exptl_absorpt_correction_T_max   0.6658 
_exptl_absorpt_process_details    
;
 SADABS (Sheldrick, 1997)
; 
 
_exptl_special_details 
; 
 ? 
; 
 
_diffrn_ambient_temperature       150(2) 
_diffrn_radiation_wavelength      0.71073 
_diffrn_radiation_type            MoK\a 
_diffrn_radiation_source          'fine-focus sealed tube'
_diffrn_radiation_monochromator   graphite
_diffrn_measurement_device_type   'Bruker X8 Kappa CCD APEX II'
_diffrn_measurement_method        'omega/phi scans'
_diffrn_detector_area_resol_mean  ? 
_diffrn_standards_number          ? 
_diffrn_standards_interval_count  ? 
_diffrn_standards_interval_time   ? 
_diffrn_standards_decay_%         ? 
_diffrn_reflns_number             6315 
_diffrn_reflns_av_R_equivalents   0.0725 
_diffrn_reflns_av_sigmaI/netI     0.0719 
_diffrn_reflns_limit_h_min        -12 
_diffrn_reflns_limit_h_max        13 
_diffrn_reflns_limit_k_min        -9 
_diffrn_reflns_limit_k_max        10 
_diffrn_reflns_limit_l_min        -14 
_diffrn_reflns_limit_l_max        13 
_diffrn_reflns_theta_min          3.76 
_diffrn_reflns_theta_max          27.47 
_reflns_number_total              1133 
_reflns_number_gt                 911 
_reflns_threshold_expression      I>2\s(I)
 
_computing_data_collection        'APEX2 (Bruker, 2006)' 
_computing_cell_refinement        'APEX2 '
_computing_data_reduction         'SAINT+ (Bruker, 1997-2005)' 
_computing_structure_solution     'SHELXTL (Bruker 2001)' 
_computing_structure_refinement   'SHELXTL '
_computing_molecular_graphics     'DIAMOND (Brandenburg, 2006)'  
_computing_publication_material   'SHELXTL ' 
 
_refine_special_details 
; 
 Refinement of F^2^ against ALL reflections.  The weighted R-factor wR and 
 goodness of fit S are based on F^2^, conventional R-factors R are based 
 on F, with F set to zero for negative F^2^. The threshold expression of 
 F^2^ > 2sigma(F^2^) is used only for calculating R-factors(gt) etc. and is 
 not relevant to the choice of reflections for refinement.  R-factors based 
 on F^2^ are statistically about twice as large as those based on F, and R- 
 factors based on ALL data will be even larger. 
; 
 
_refine_ls_structure_factor_coef  Fsqd  
_refine_ls_matrix_type            full 
_refine_ls_weighting_scheme       calc  
_refine_ls_weighting_details 
 'calc w=1/[\s^2^(Fo^2^)+(0.0154P)^2^+9.8118P] where P=(Fo^2^+2Fc^2^)/3' 
_atom_sites_solution_primary      direct 
_atom_sites_solution_secondary    difmap 
_atom_sites_solution_hydrogens    geom 
_refine_ls_hydrogen_treatment     constr 
_refine_ls_extinction_method      none 
_refine_ls_extinction_coef        ? 
_refine_ls_number_reflns          1133 
_refine_ls_number_parameters      85 
_refine_ls_number_restraints      0 
_refine_ls_R_factor_all           0.0598 
_refine_ls_R_factor_gt            0.0393 
_refine_ls_wR_factor_ref          0.0690 
_refine_ls_wR_factor_gt           0.0642 
_refine_ls_goodness_of_fit_ref    1.080 
_refine_ls_restrained_S_all       1.080 
_refine_ls_shift/su_max           0.000 
_refine_ls_shift/su_mean          0.000 
 
loop_ 
 _atom_site_label 
 _atom_site_type_symbol 
 _atom_site_fract_x 
 _atom_site_fract_y 
 _atom_site_fract_z 
 _atom_site_U_iso_or_equiv 
 _atom_site_adp_type 
 _atom_site_occupancy 
 _atom_site_symmetry_multiplicity 
 _atom_site_calc_flag 
 _atom_site_refinement_flags 
 _atom_site_disorder_assembly 
 _atom_site_disorder_group 
Nd1 Nd 0.37652(5) 0.5000 0.21111(5) 0.01484(16) Uani 1 2 d S . . 
O1W O 0.2974(5) 0.5000 -0.0246(6) 0.0259(15) Uani 1 2 d S . . 
O1 O 0.5768(5) 0.5000 0.3826(6) 0.0285(16) Uani 1 2 d S . . 
O2 O 0.6641(5) 0.5000 0.5871(6) 0.0220(15) Uani 1 2 d S . . 
O3 O 0.5154(5) 0.3260(6) 0.1343(5) 0.0444(15) Uani 1 1 d . . . 
O4 O 0.6860(4) 0.1672(5) 0.1650(4) 0.0280(11) Uani 1 1 d . . . 
N1 N 0.4301(5) 0.1709(7) 0.2980(5) 0.0241(13) Uani 1 1 d . . . 
C1 C 0.5705(9) 0.5000 0.4912(9) 0.024(2) Uani 1 2 d S . . 
C2 C 0.3604(6) 0.0878(8) 0.3595(7) 0.0280(16) Uani 1 1 d . . . 
H2 H 0.3105 0.1459 0.4035 0.034 Uiso 1 1 calc R . . 
C3 C 0.5068(5) 0.0862(8) 0.2427(6) 0.0208(15) Uani 1 1 d . . . 
C4 C 0.5755(6) 0.1997(8) 0.1752(6) 0.0205(14) Uani 1 1 d . . . 
 
loop_ 
 _atom_site_aniso_label 
 _atom_site_aniso_U_11 
 _atom_site_aniso_U_22 
 _atom_site_aniso_U_33 
 _atom_site_aniso_U_23 
 _atom_site_aniso_U_13 
 _atom_site_aniso_U_12 
Nd1 0.0082(2) 0.0164(3) 0.0222(3) 0.000 0.00810(18) 0.000 
O1W 0.013(3) 0.042(4) 0.025(4) 0.000 0.010(3) 0.000 
O1 0.012(3) 0.042(4) 0.032(4) 0.000 0.008(3) 0.000 
O2 0.010(3) 0.034(4) 0.022(4) 0.000 0.004(3) 0.000 
O3 0.061(3) 0.039(3) 0.050(4) 0.027(3) 0.044(3) 0.039(3) 
O4 0.014(2) 0.029(3) 0.044(3) 0.010(2) 0.013(2) 0.003(2) 
N1 0.019(3) 0.025(3) 0.033(4) 0.002(3) 0.015(3) 0.001(3) 
C1 0.025(5) 0.020(5) 0.031(6) 0.000 0.015(5) 0.000 
C2 0.028(4) 0.023(3) 0.035(4) 0.000(3) 0.013(3) 0.011(3) 
C3 0.009(3) 0.028(4) 0.027(4) 0.001(3) 0.007(3) -0.001(3) 
C4 0.019(3) 0.020(4) 0.021(4) -0.005(3) 0.004(3) 0.006(3) 
 
_geom_special_details 
; 
 All esds (except the esd in the dihedral angle between two l.s. planes) 
 are estimated using the full covariance matrix.  The cell esds are taken 
 into account individually in the estimation of esds in distances, angles 
 and torsion angles; correlations between esds in cell parameters are only 
 used when they are defined by crystal symmetry.  An approximate (isotropic) 
 treatment of cell esds is used for estimating esds involving l.s. planes. 
; 
 
loop_ 
 _geom_bond_atom_site_label_1 
 _geom_bond_atom_site_label_2 
 _geom_bond_distance 
 _geom_bond_site_symmetry_2 
 _geom_bond_publ_flag 
Nd1 O4 2.382(4) 8_455 ? 
Nd1 O4 2.382(4) 3_455 ? 
Nd1 O3 2.384(4) 6_565 ? 
Nd1 O3 2.384(4) . ? 
Nd1 O2 2.437(6) 5_666 ? 
Nd1 O1 2.451(6) . ? 
Nd1 O1W 2.557(6) . ? 
Nd1 N1 2.855(5) 6_565 ? 
Nd1 N1 2.855(5) . ? 
O1 C1 1.247(11) . ? 
O2 C1 1.251(11) . ? 
O2 Nd1 2.437(6) 5_666 ? 
O3 C4 1.232(7) . ? 
O4 C4 1.246(7) . ? 
O4 Nd1 2.382(4) 3_545 ? 
N1 C2 1.336(8) . ? 
N1 C3 1.351(8) . ? 
C1 C1 1.573(18) 5_666 ? 
C2 C2 1.430(13) 6 ? 
C2 H2 0.9500 . ? 
C3 C3 1.403(13) 6 ? 
C3 C4 1.513(9) . ? 
 
loop_ 
 _geom_angle_atom_site_label_1 
 _geom_angle_atom_site_label_2 
 _geom_angle_atom_site_label_3 
 _geom_angle 
 _geom_angle_site_symmetry_1 
 _geom_angle_site_symmetry_3 
 _geom_angle_publ_flag 
O4 Nd1 O4 69.7(2) 8_455 3_455 ? 
O4 Nd1 O3 147.25(17) 8_455 6_565 ? 
O4 Nd1 O3 99.35(17) 3_455 6_565 ? 
O4 Nd1 O3 99.35(17) 8_455 . ? 
O4 Nd1 O3 147.25(17) 3_455 . ? 
O3 Nd1 O3 72.9(2) 6_565 . ? 
O4 Nd1 O2 80.74(15) 8_455 5_666 ? 
O4 Nd1 O2 80.74(15) 3_455 5_666 ? 
O3 Nd1 O2 129.25(14) 6_565 5_666 ? 
O3 Nd1 O2 129.25(14) . 5_666 ? 
O4 Nd1 O1 132.55(15) 8_455 . ? 
O4 Nd1 O1 132.55(15) 3_455 . ? 
O3 Nd1 O1 78.05(18) 6_565 . ? 
O3 Nd1 O1 78.05(18) . . ? 
O2 Nd1 O1 66.8(2) 5_666 . ? 
O4 Nd1 O1W 76.09(15) 8_455 . ? 
O4 Nd1 O1W 76.09(15) 3_455 . ? 
O3 Nd1 O1W 71.27(16) 6_565 . ? 
O3 Nd1 O1W 71.27(16) . . ? 
O2 Nd1 O1W 151.66(18) 5_666 . ? 
O1 Nd1 O1W 141.56(19) . . ? 
O4 Nd1 N1 133.46(14) 8_455 6_565 ? 
O4 Nd1 N1 67.42(15) 3_455 6_565 ? 
O3 Nd1 N1 58.84(15) 6_565 6_565 ? 
O3 Nd1 N1 126.67(17) . 6_565 ? 
O2 Nd1 N1 75.49(11) 5_666 6_565 ? 
O1 Nd1 N1 71.44(11) . 6_565 ? 
O1W Nd1 N1 109.51(11) . 6_565 ? 
O4 Nd1 N1 67.42(15) 8_455 . ? 
O4 Nd1 N1 133.46(14) 3_455 . ? 
O3 Nd1 N1 126.67(17) 6_565 . ? 
O3 Nd1 N1 58.84(15) . . ? 
O2 Nd1 N1 75.49(11) 5_666 . ? 
O1 Nd1 N1 71.44(11) . . ? 
O1W Nd1 N1 109.51(11) . . ? 
N1 Nd1 N1 139.5(2) 6_565 . ? 
C1 O1 Nd1 120.1(6) . . ? 
C1 O2 Nd1 120.0(5) . 5_666 ? 
C4 O3 Nd1 132.3(4) . . ? 
C4 O4 Nd1 151.0(4) . 3_545 ? 
C2 N1 C3 118.8(5) . . ? 
C2 N1 Nd1 124.5(4) . . ? 
C3 N1 Nd1 114.1(4) . . ? 
O1 C1 O2 126.9(8) . . ? 
O1 C1 C1 116.2(11) . 5_666 ? 
O2 C1 C1 116.9(10) . 5_666 ? 
N1 C2 C2 120.4(4) . 6 ? 
N1 C2 H2 119.8 . . ? 
C2 C2 H2 119.8 6 . ? 
N1 C3 C3 120.7(3) . 6 ? 
N1 C3 C4 111.5(5) . . ? 
C3 C3 C4 127.6(3) 6 . ? 
O3 C4 O4 123.4(6) . . ? 
O3 C4 C3 115.0(5) . . ? 
O4 C4 C3 121.6(6) . . ? 
 
loop_ 
 _geom_torsion_atom_site_label_1 
 _geom_torsion_atom_site_label_2 
 _geom_torsion_atom_site_label_3 
 _geom_torsion_atom_site_label_4 
 _geom_torsion 
 _geom_torsion_site_symmetry_1 
 _geom_torsion_site_symmetry_2 
 _geom_torsion_site_symmetry_3 
 _geom_torsion_site_symmetry_4 
 _geom_torsion_publ_flag 
O4 Nd1 O1 C1 -50.83(17) 8_455 . . . ? 
O4 Nd1 O1 C1 50.83(17) 3_455 . . . ? 
O3 Nd1 O1 C1 142.61(12) 6_565 . . . ? 
O3 Nd1 O1 C1 -142.61(12) . . . . ? 
O2 Nd1 O1 C1 0.000(1) 5_666 . . . ? 
O1W Nd1 O1 C1 180.000(2) . . . . ? 
N1 Nd1 O1 C1 81.75(12) 6_565 . . . ? 
N1 Nd1 O1 C1 -81.75(12) . . . . ? 
O4 Nd1 O3 C4 -75.8(6) 8_455 . . . ? 
O4 Nd1 O3 C4 -142.5(6) 3_455 . . . ? 
O3 Nd1 O3 C4 137.0(6) 6_565 . . . ? 
O2 Nd1 O3 C4 9.9(7) 5_666 . . . ? 
O1 Nd1 O3 C4 56.0(6) . . . . ? 
O1W Nd1 O3 C4 -147.5(7) . . . . ? 
N1 Nd1 O3 C4 111.7(6) 6_565 . . . ? 
N1 Nd1 O3 C4 -19.4(6) . . . . ? 
O4 Nd1 N1 C2 -46.4(5) 8_455 . . . ? 
O4 Nd1 N1 C2 -22.2(6) 3_455 . . . ? 
O3 Nd1 N1 C2 168.0(5) 6_565 . . . ? 
O3 Nd1 N1 C2 -163.6(6) . . . . ? 
O2 Nd1 N1 C2 39.5(5) 5_666 . . . ? 
O1 Nd1 N1 C2 109.4(5) . . . . ? 
O1W Nd1 N1 C2 -111.3(5) . . . . ? 
N1 Nd1 N1 C2 84.9(6) 6_565 . . . ? 
O4 Nd1 N1 C3 115.0(4) 8_455 . . . ? 
O4 Nd1 N1 C3 139.2(4) 3_455 . . . ? 
O3 Nd1 N1 C3 -30.6(5) 6_565 . . . ? 
O3 Nd1 N1 C3 -2.1(4) . . . . ? 
O2 Nd1 N1 C3 -159.1(4) 5_666 . . . ? 
O1 Nd1 N1 C3 -89.2(4) . . . . ? 
O1W Nd1 N1 C3 50.1(4) . . . . ? 
N1 Nd1 N1 C3 -113.7(4) 6_565 . . . ? 
Nd1 O1 C1 O2 180.000(2) . . . . ? 
Nd1 O1 C1 C1 0.000(2) . . . 5_666 ? 
Nd1 O2 C1 O1 180.000(2) 5_666 . . . ? 
Nd1 O2 C1 C1 0.000(2) 5_666 . . 5_666 ? 
C3 N1 C2 C2 -4.2(7) . . . 6 ? 
Nd1 N1 C2 C2 156.43(19) . . . 6 ? 
C2 N1 C3 C3 4.2(7) . . . 6 ? 
Nd1 N1 C3 C3 -158.4(5) . . . 6 ? 
C2 N1 C3 C4 178.6(6) . . . . ? 
Nd1 N1 C3 C4 16.0(6) . . . . ? 
Nd1 O3 C4 O4 -142.8(5) . . . . ? 
Nd1 O3 C4 C3 35.7(9) . . . . ? 
Nd1 O4 C4 O3 172.9(6) 3_545 . . . ? 
Nd1 O4 C4 C3 -5.5(13) 3_545 . . . ? 
N1 C3 C4 O3 -30.4(8) . . . . ? 
C3 C3 C4 O3 143.5(4) 6 . . . ? 
N1 C3 C4 O4 148.1(6) . . . . ? 
C3 C3 C4 O4 -38.0(8) 6 . . . ? 
 
_diffrn_measured_fraction_theta_max    0.974 
_diffrn_reflns_theta_full              27.47 
_diffrn_measured_fraction_theta_full   0.974 
_refine_diff_density_max    1.197 
_refine_diff_density_min   -1.738 
_refine_diff_density_rms    0.262 

# ===== LMCS 2009 ===== #  

# ===== END ===== #  
